# Supplementary material
Source: PubMed Central journal article supplement (PMC4684965)
Supplement: NIHMS734912-supplement-1.pdf [file NIHMS734912-supplement-1.pdf]

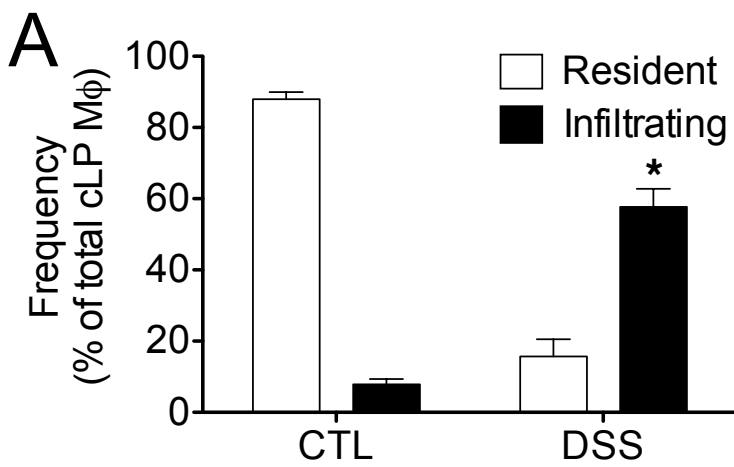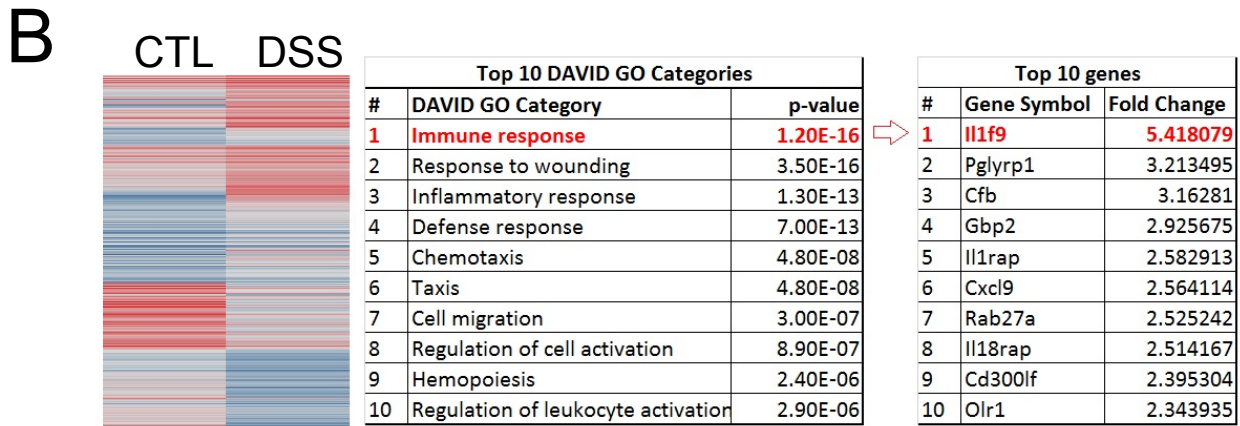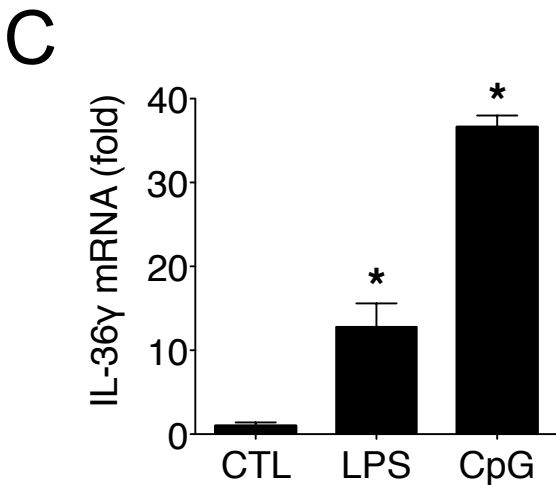

**Supplemental Figure 1.** Inflammatory Mφ accumulate in colons of DSS-treated mice and express IL-36γ. (A) Frequency of resident (Cx3cr1<sup>hi</sup>Ly6C<sup>-</sup>) and infiltrating (Cx3cr1<sup>lo/int</sup>Ly6C<sup>+</sup>) cLP in the colon of WT mice treated for 5 d with 3% DSS. \**P* < 0.05. Data are representative of three independent experiments with three to five mice per group. (B) Microarray expression analyses of cLP Mφ from CTL or 5 d DSS-treated WT mice. Hierarchical clustering (heatmap) and top 10 GO categorization are shown along with the top 10 genes within the Immune response category. (C) IL-36γ mRNA expression in bone marrow-derived macrophages treated for 12 h with LPS or CpG. Data are representative of two independent experiments. \**P* < 0.05.

**A**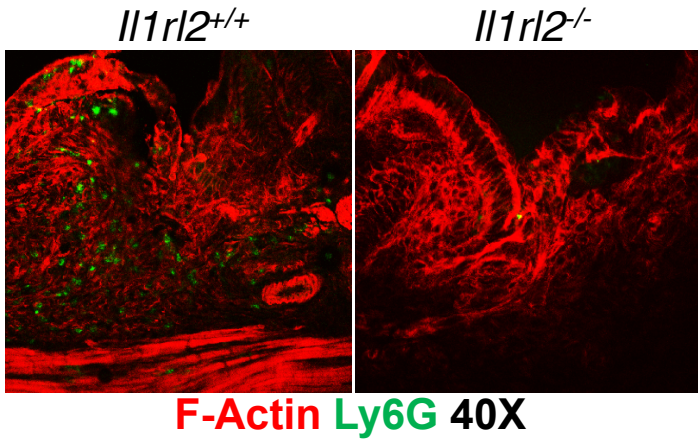**B**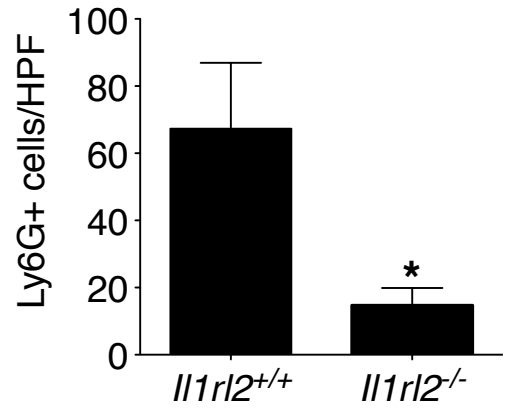**C**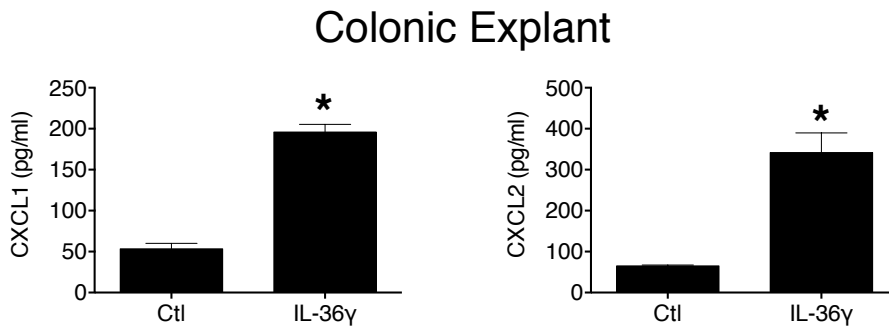**D**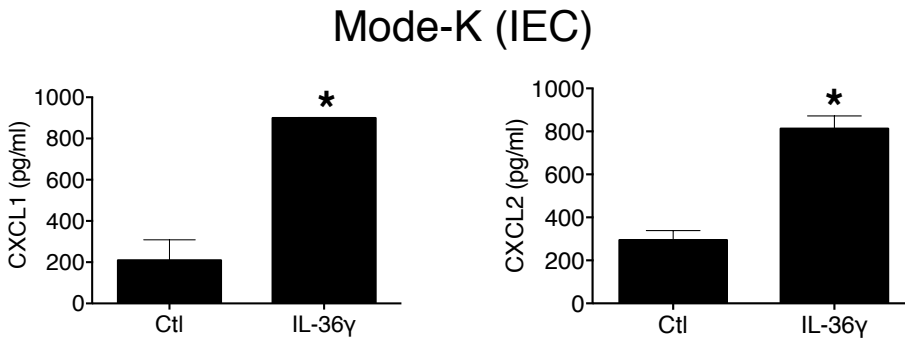

**Supplemental Figure 2.** The IL-36/IL-36R axis regulates neutrophil accumulation in colonic wounds and CXCL1 and CXCL2 expression by IECs. (A) Immunofluorescence on frozen sections of resealing colonic wounds in *Il1rl2<sup>+/+</sup>* and *Il1rl2<sup>-/-</sup>* mice on 2 d showing F-actin (red) and Ly6G (green), original magnification  $\times 40$ . (B) Quantification of Ly6G+ cells per high power field (HPF). (C) ELISA of CXCL1 and CXCL2 in supernatants of colonic explant cultures stimulated for 24 h with IL-36 $\gamma$  (100ng/mL). (D) ELISA of CXCL1 and CXCL2 on supernatants of Mode-K IEC cells stimulated as in (C). Data are representative of two independent experiments. \* $P < 0.05$ .
